# Supplementary material for: Novel 3-D nanoporous graphitic-C3N4 nanosheets with heterostructured modification for efficient visible-light photocatalytic hydrogen production
Source: Royal Society of Chemistry journal article supplement (doi:10.1039/c4ra10038g), 2014-01-01
Supplement: c4ra10038g1.pdf [file c4ra10038g1.pdf]

# Novel 3-D nanoporous graphitic-C<sub>3</sub>N<sub>4</sub> nanosheets with heterostructured modification for efficient visible-light photocatalytic hydrogen production

Jielin Yuan,<sup>a</sup> Qiongzhi Gao,<sup>\*a</sup> Xin Li,<sup>a</sup> Yingju Liu,<sup>a</sup> Yueping Fang,<sup>\*a</sup> Siyuan Yang<sup>c</sup>, Feng Peng<sup>c</sup> and Xiaosong Zhou<sup>\*b</sup>

<sup>a</sup>Institute of Biomaterial, College of Science, South China Agricultural University, Guangzhou 510642, China;

<sup>b</sup>School of Chemistry Science & Technology, and Institute of Physical Chemistry, Zhanjiang Normal University, Zhanjiang 524048., China;

<sup>c</sup>School of Chemistry and Chemical Engineering, South China University of Technology, Guangzhou, PR China.

Correspondence author: Y.P. Fang Tel: 86-20-85285565. Fax: 86-20-85285565. E-mail: [ypfang@scau.edu.cn](mailto:ypfang@scau.edu.cn); X.S. Zhou E-mail: [zxs801213@163.com](mailto:zxs801213@163.com)

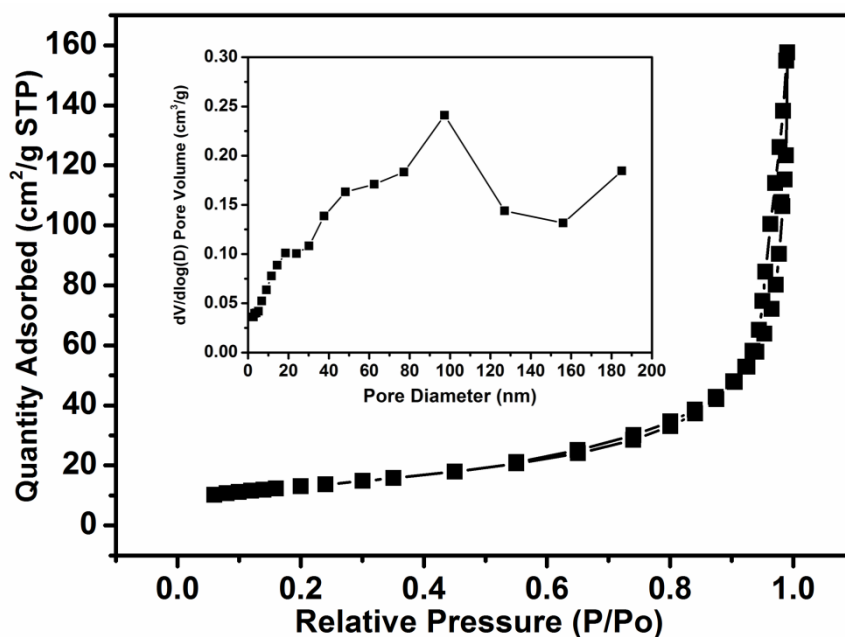

Fig. S1 Nitrogen adsorption-desorption isotherms and corresponding pore-size distribution (inset) of the porous g-C<sub>3</sub>N<sub>4</sub> nanosheets

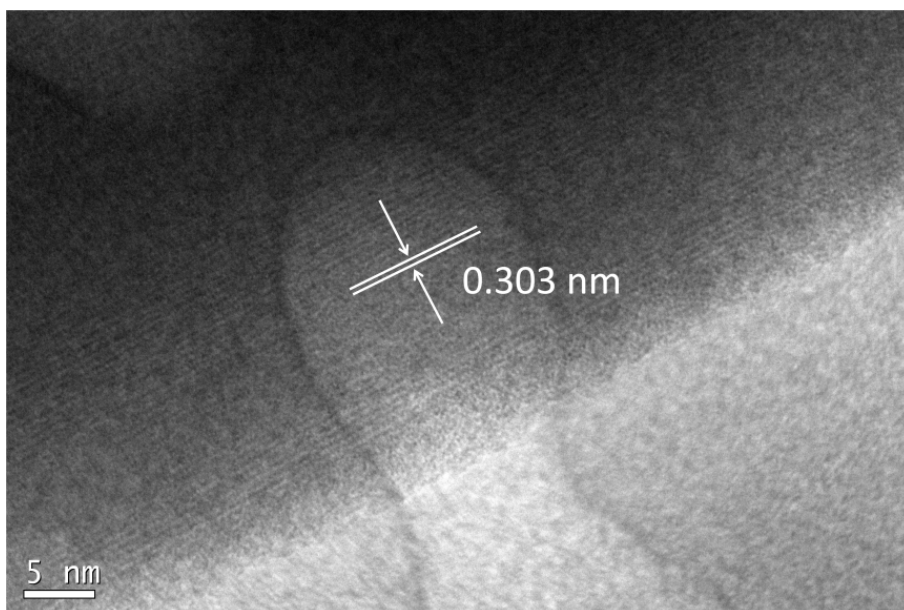

Fig. S2 HRTEM image with the lattice spacing of 0.303 nm by the analyses of P-C<sub>3</sub>N<sub>4</sub>/BiPO<sub>4</sub> 3% wt. samples.

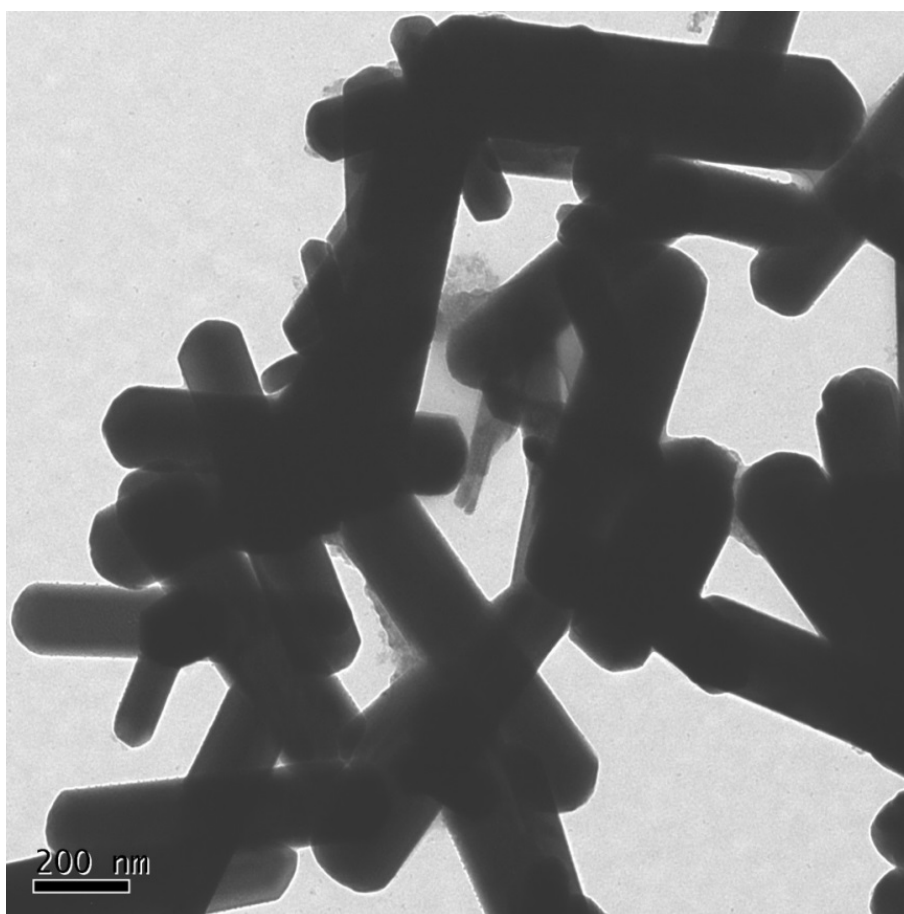

Fig. S3 Typical TEM images of pure BiPO<sub>4</sub> nanorods from hydrothermal reaction without adding amino cyanide (CH<sub>2</sub>N<sub>2</sub>) solution
